# Supplementary material
Source: PubMed Central journal article supplement (PMC8921319)
Supplement: mmc2.pdf [file mmc2.pdf]

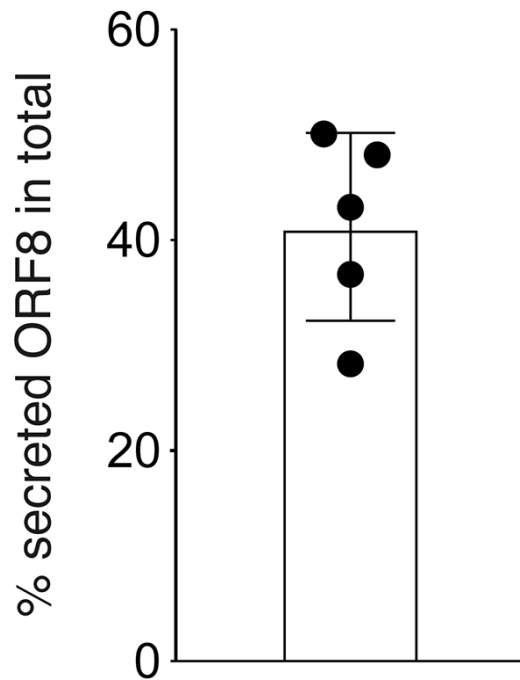

**Figure S1.** Ratio (%) of secreted ORF8 protein in total. The FLAG-tagged ORF8 proteins were immunoprecipitated from each fraction of the transfected cell and supernatant with anti-FLAG mAb beads. The IP fractions were analyzed by immunoblotting using anti-FLAG mAb. The band intensity of the cell and the supernatant was quantified. The ratio (%) was determined by dividing the supernatant level by the sum (the cell and supernatant). The bar graph represents the mean  $\pm$  SD (error bars) from five independent assays.
